# Supplementary material for: Kinome and mRNA expression profiling of high-grade osteosarcoma cell lines implies Akt signaling as possible target for therapy
Source: PubMed Central journal article supplement (PMC3932036; doi:10.1186/1755-8794-7-4), 2014-01-21
Supplement: 1755-8794-7-4-S2.pdf [file 1755-8794-7-4-S2.pdf]

Color Key

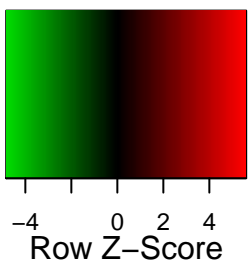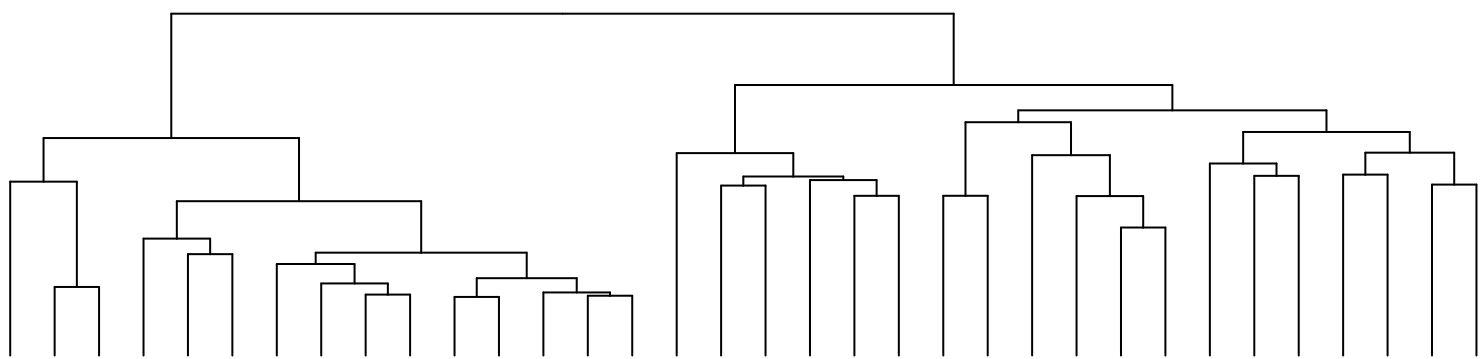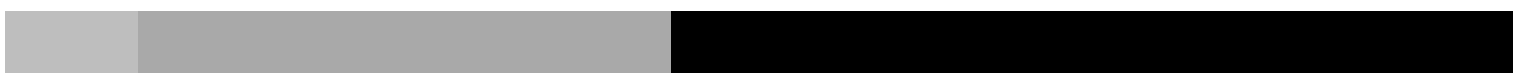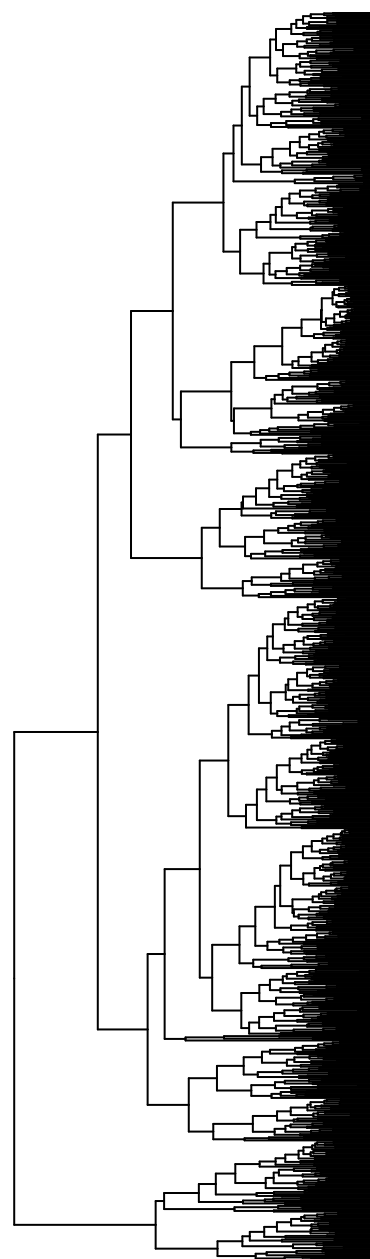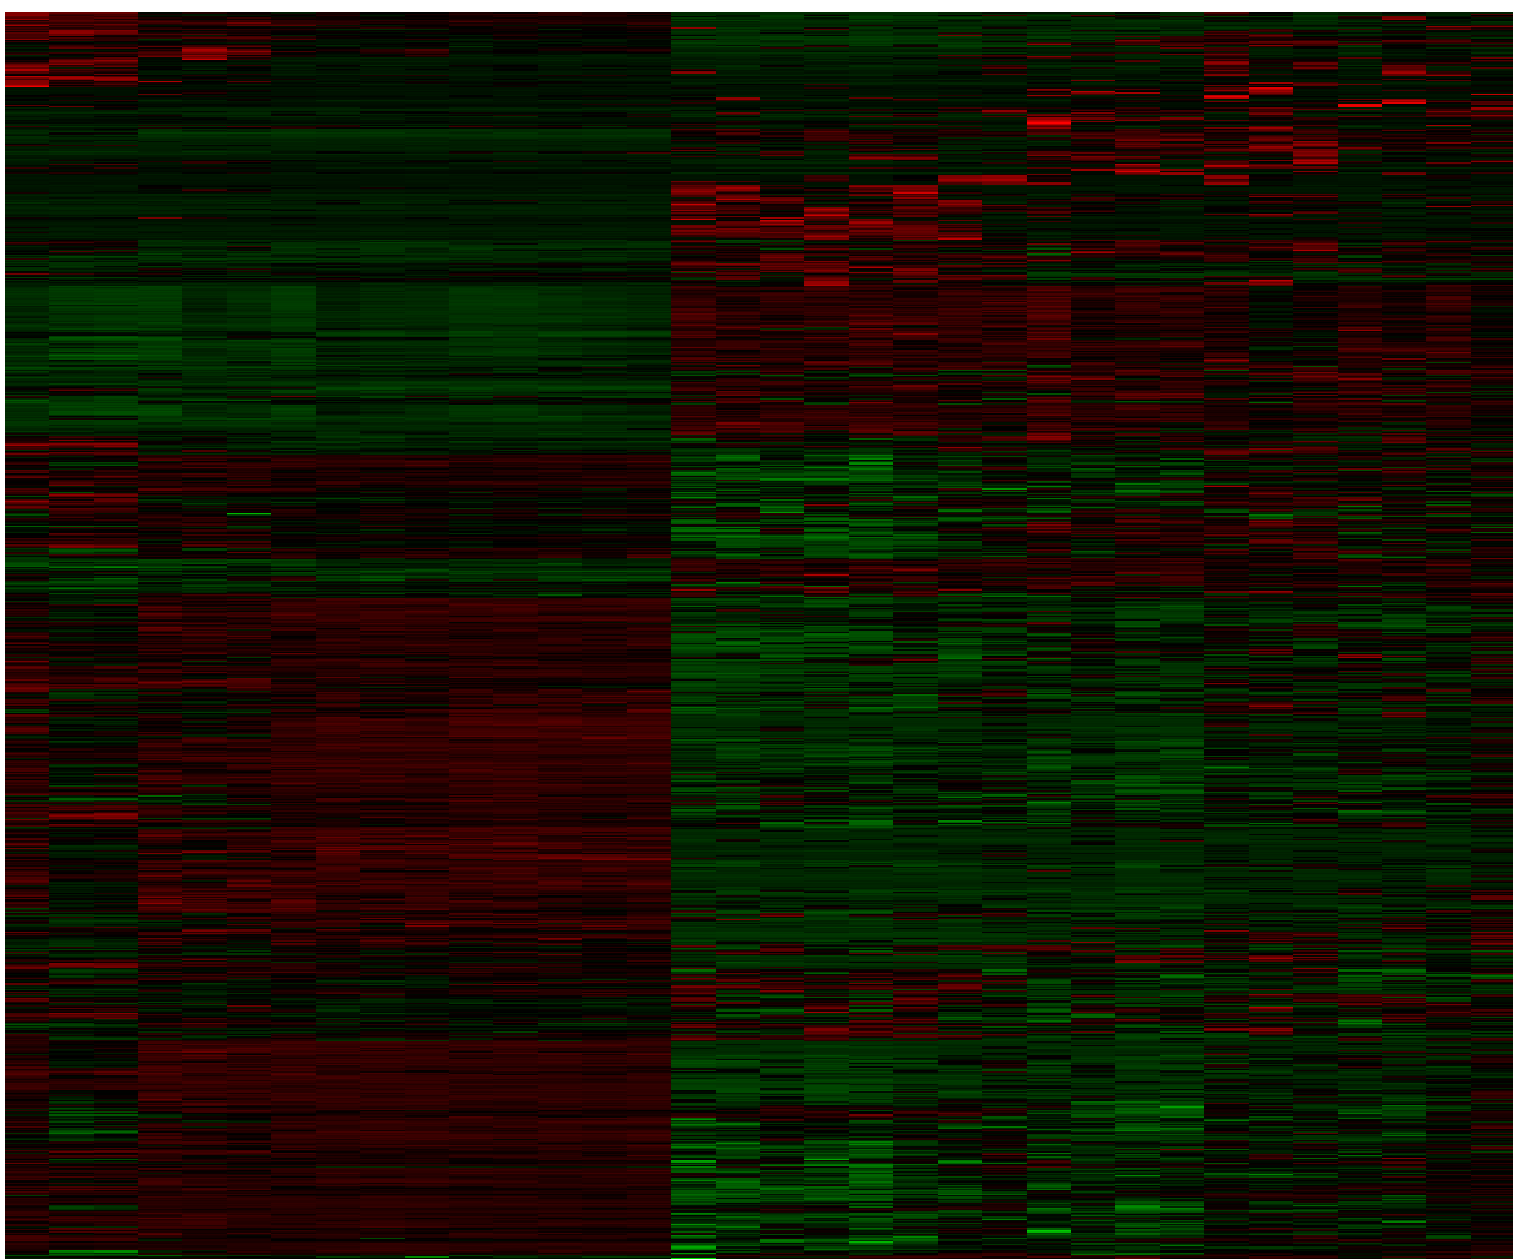

Kaat-OB  
240-OB  
220-OB  
240-Msc  
220-Msc  
Kaat-Msc  
MSC\_006\_OS  
MSC\_003\_OS\_2  
MSC\_002\_OS  
MSC\_HD5  
MSC\_001\_OS  
MSC\_HD3  
MSC\_TD\_001  
MSC\_MH  
MSC\_009\_OS  
ZK-58  
OHS  
IOR-OS15  
KPD  
IOR-SARG  
OS25-HAL  
SAOS2  
IOR-OS14  
U2OS  
HOS  
143B  
MNNG-HOS  
MHM  
OSA  
IOR-OS10  
IOR-MG63  
IOR-MOS  
IOR-OS9  
IOR-OS18
