# Supplementary material for: Kinome and mRNA expression profiling of high-grade osteosarcoma cell lines implies Akt signaling as possible target for therapy
Source: PubMed Central journal article supplement (PMC3932036; doi:10.1186/1755-8794-7-4), 2014-01-21
Supplement: 1755-8794-7-4-S8.pdf [file 1755-8794-7-4-S8.pdf]

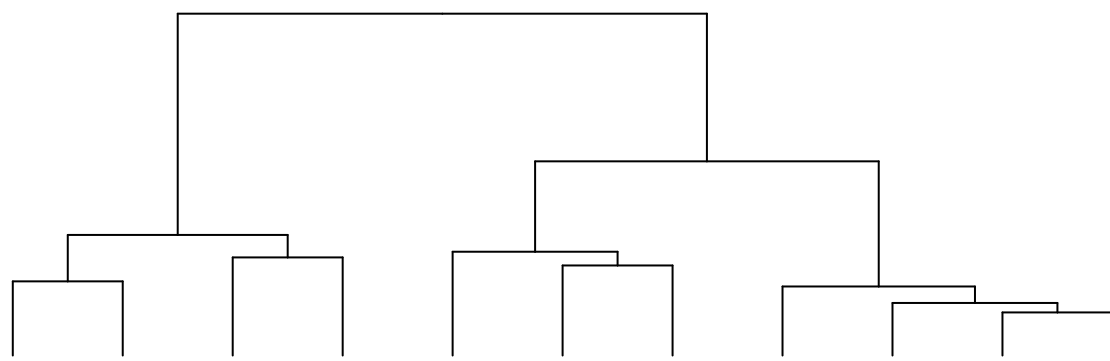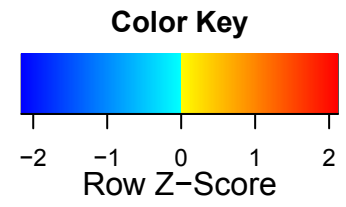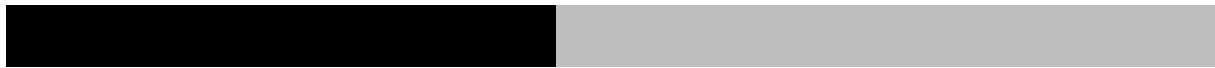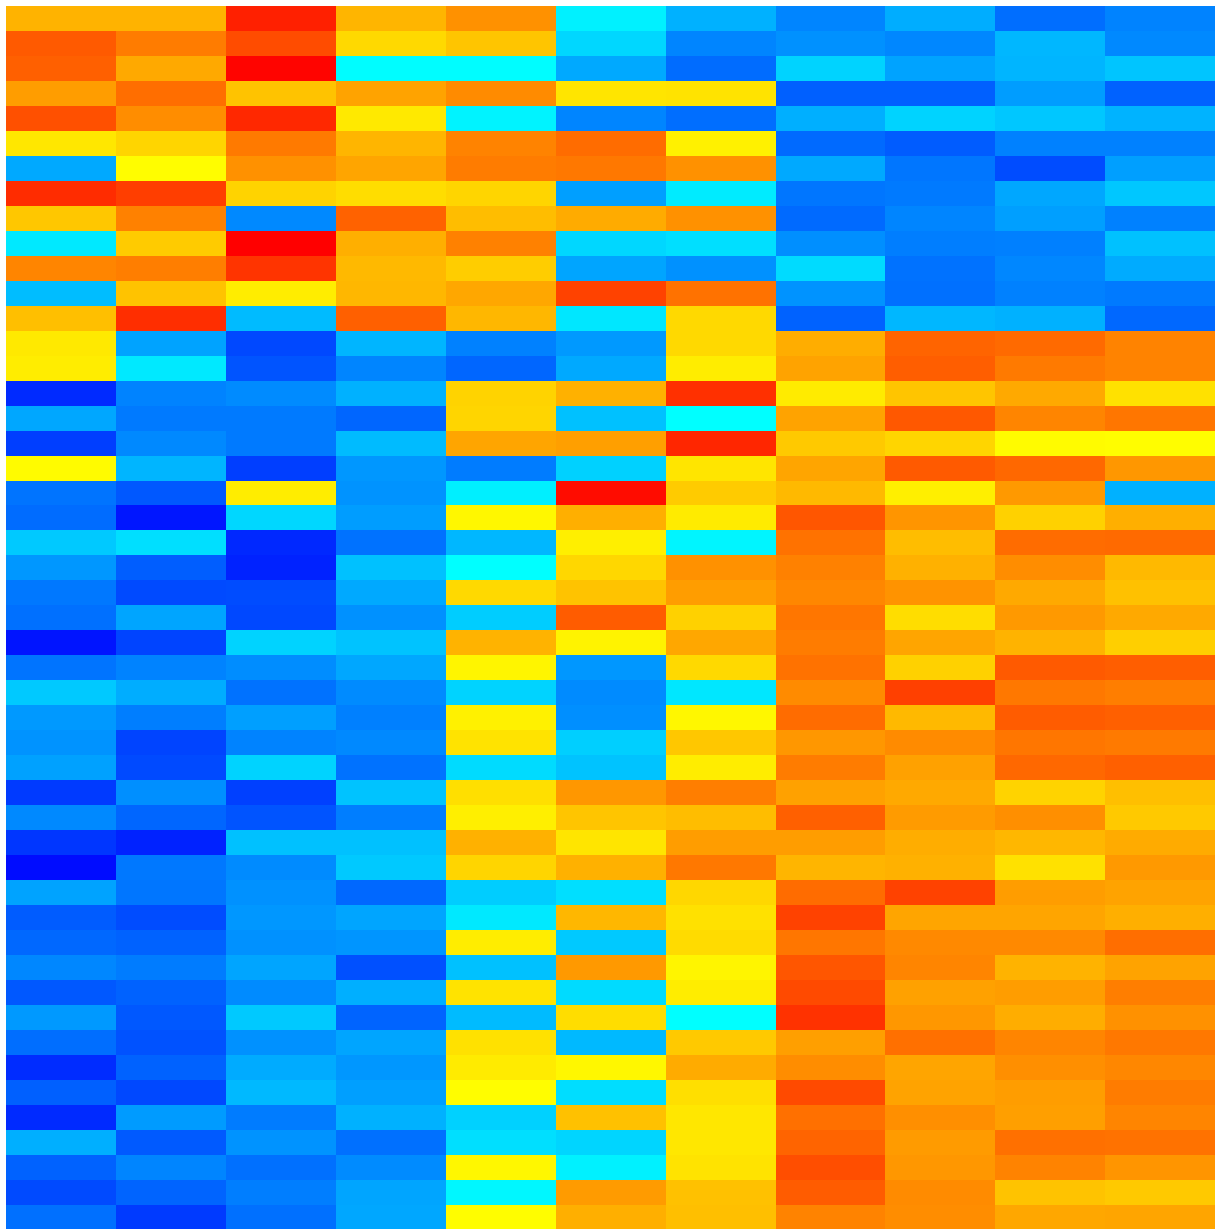

RAF1\_253\_265QRQRSTSTPNVHM  
 VASP\_271\_283LARRRKATQVGEK  
 E1A\_ADE05\_212\_224AILRRPTSPVSRE  
 PRKDC\_2618\_2630TRTQEGSLARWP  
 P53\_12\_24PPLSQETFSDLWK  
 KIF2C\_105\_118\_S106GEGRLSRSTRMSTVS  
 CDN1A\_139\_151GRKRRQTSMTDFY  
 PP2AB\_297\_309EPHVTRRTPDYFL  
 RBL2\_655\_667GLGRSITSPTTLY  
 BAD\_112\_124RELRRMSDEFVDS  
 PLEK\_106\_118GQKFARKSTRRSI  
 FOXO3\_25\_37QSRPRSCTWPLQR  
 NEK2\_172\_184FAKTFVGTPTYMS  
 IKKB\_686\_698QLMSQPSTASNSL  
 IKKB\_173\_185\_C179ALDQGSLSATSFVGT  
 KCNA3\_461\_473EELRKARSNSTLS  
 DESP\_2842\_2854RSGSRRGSFDATG  
 FRAP\_2443\_2455RTRTDSYSAGQSV  
 LMNA\_192\_204DAENRLQTMKEEL  
 KPCB\_19\_31\_A25SRFARKGSLRQKNV  
 NCF1\_296\_308RGAPRRSSIRNA  
 KAP2\_92\_104SRFNRRVSVCAET  
 SCN7A\_898\_910KNGCRRGSSSLGQI  
 REL\_260\_272KMQLRRPSDQEVS  
 RS6\_228\_240IAKRRRLSSLRAS  
 NMDZ1\_890\_902SFKRRRSSKDTST  
 ADRB2\_338\_350ELLCLRRSSLKAY  
 KPB1\_1011\_1023QVEFRRLSISAES  
 ART\_025\_CXGLRRWSLGLRRWSLGLRRWSLGLRRWSL  
 CAC1C\_1974\_1986ASLGRRASFHLEC  
 CREB1\_126\_138EILSRRPSYRKIL  
 LIPS\_944\_956GFHPRRSSQGATQ  
 VTNC\_390\_402NQNSRRRPSRATWL  
 PTK6\_436\_448ALRERLSSFTSYE  
 CSF1R\_701\_713NIHLEKKYVRRDS  
 NCF1\_321\_333QDAYRRNSVRFLLQ  
 KAP3\_107\_119NRFTRRASVCAEA  
 MYPC3\_268\_280LSAFRRRTSLAGGG  
 PTN12\_32\_44FMRLRRLSTKYRT  
 F263\_454\_466NPLMRRNSVTPLA  
 GBRB2\_427\_439SRLRRRASQLKIT  
 CFTR\_730\_742EPLERLRLSLVPDS  
 GPM2\_394\_406PKLGRRHSMENME  
 CFTR\_761\_773LQARRRQSVLNLN  
 GRIK2\_708\_720FMSSRRQSVLVKS  
 EPB42\_241\_253LLNKRRGSVPILR  
 TY3H\_65\_77FIGRRQSLIEDAR  
 KCNA6\_504\_516ANRERRRPSVLP  
 VASP\_150\_162EHIERRVSNAGGP

U2OS\_3  
 U2OS\_2  
 U2OS\_4  
 143B\_1  
 U2OS\_1  
 MSC1\_1  
 MSC6\_1  
 MSC1\_3  
 MSC6\_3  
 MSC6\_2  
 MSC1\_2
