# Supplementary material for: Kinome and mRNA expression profiling of high-grade osteosarcoma cell lines implies Akt signaling as possible target for therapy
Source: PubMed Central journal article supplement (PMC3932036; doi:10.1186/1755-8794-7-4), 2014-01-21

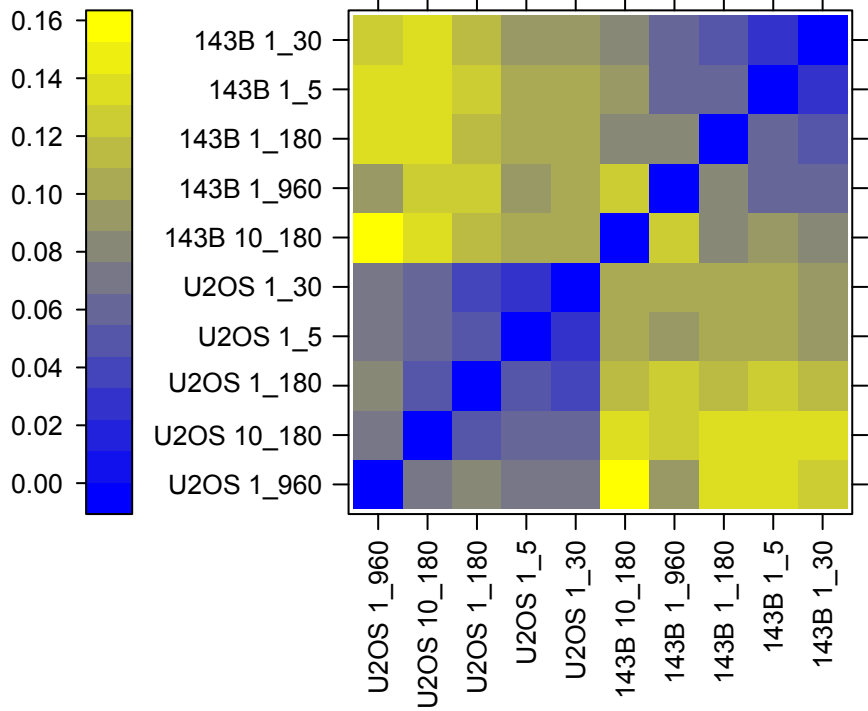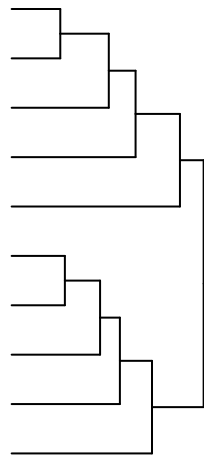

Supplement: 1755-8794-7-4-S10.pdf [file 1755-8794-7-4-S10.pdf]
